# Supplementary material
Source: PubMed Central journal article supplement (PMC4388612)

**A.**

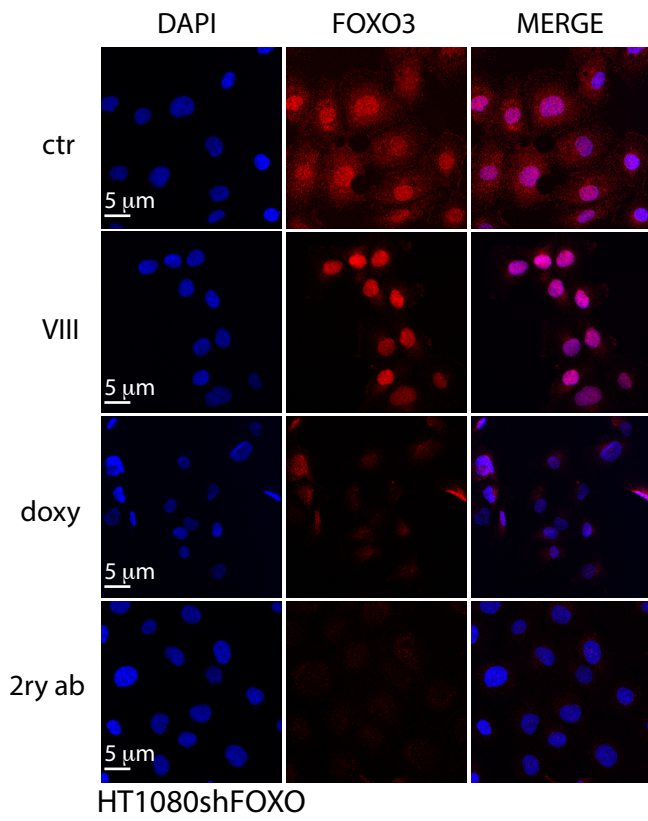

**B.**

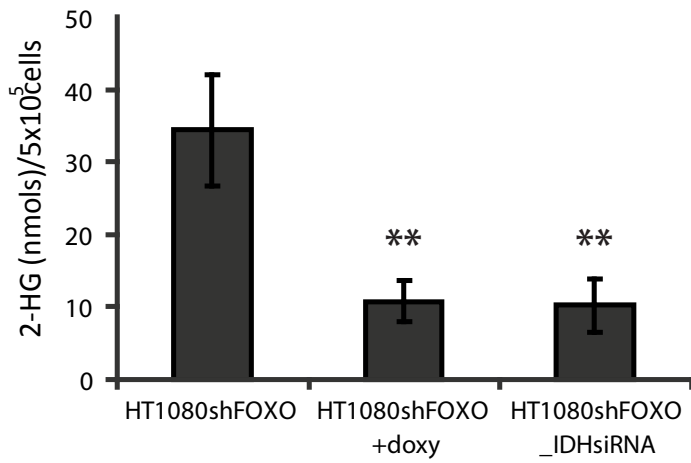

Supplement: embr0016-0456-sd3.pdf [file embr0016-0456-sd3.pdf]
